## The activation of SRC family kinases and focal adhesion kinase with the loss of the amplified, mutated *EGFR* gene contributes to the resistance to afatinib, erlotinib and osimertinib in human lung cancer cells

Yuichi Murakami<sup>1,2,\*</sup>, Kahori Sonoda<sup>1,\*</sup>, Hideyuki Abe<sup>3</sup>, Kosuke Watari<sup>1</sup>, Daiki Kusakabe<sup>1,4</sup>, Koichi Azuma<sup>5</sup>, Akihiko Kawahara<sup>3</sup>, Jun Akiba<sup>3</sup>, Chitose Oneyama<sup>6</sup>, Jonathan A. Pachter<sup>7</sup>, Kazuko Sakai<sup>8</sup>, Kazuto Nishio<sup>8</sup>, Michihiko Kuwano<sup>2</sup> and Mayumi Ono<sup>1</sup>

<sup>1</sup>Department of Pharmaceutical Oncology, Graduate School of Pharmaceutical Sciences, Kyushu University, Fukuoka, Japan

<sup>2</sup>Cancer Translational Research Center, St. Mary's Institute of Health Sciences, Fukuoka, Japan

<sup>3</sup>Department of Diagnostic Pathology, Kurume University Hospital, Fukuoka, Japan

<sup>4</sup>Physical Chemistry for Life Science Laboratory, Faculty of Pharmaceutical Sciences, Kyushu University, Fukuoka, Japan

<sup>5</sup>Division of Respiratory, Neurology and Rheumatology, Department of Internal Medicine, Kurume University School of Medicine, Fukuoka, Japan

<sup>6</sup>Division of Microbiology and Oncology, Aichi Cancer Center Research Institute, Nagoya, Japan

<sup>7</sup>Verastem Inc., Cambridge, MA, USA

<sup>8</sup>Department of Genome Biology, Kinki University Faculty of Medicine, Osaka, Japan

\*These authors have contributed equally to this work

**Correspondence to:** Mayumi Ono, **email:** mono@phar.kyushu-u.ac.jp

**Keywords:** afatinib resistance, SRC family kinase, focal adhesion kinase, non-small cell lung cancer

**Received:** February 28, 2017

**Accepted:** July 18, 2017

**Published:** August 07, 2017

**Copyright:** Murakami et al. This is an open-access article distributed under the terms of the Creative Commons Attribution License 3.0 (CC BY 3.0), which permits unrestricted use, distribution, and reproduction in any medium, provided the original author and source are credited.

### ABSTRACT

Second- and third-generation inhibitors of epidermal growth factor receptor (EGFR) tyrosine kinase activity (EGFR-TKIs) are improving the treatment of patients with non-small cell lung cancer. Here we established two sublines (BR1-8 and BR2-3) resistant to a second-generation inhibitor, afatinib, from the human lung cancer cell line HCC827 that harbors a mutation that activates the tyrosine kinase activity of EGFR. These afatinib-resistant sublines were resistant to first-generation EGFR-TKIs, gefitinib and erlotinib, and a third-generation EGFR-TKI, osimertinib. These resistant sublines showed markedly reduced levels of multiple EGFR family proteins, including the activated mutant EGFR, and complete loss of EGFR amplification as compared with their parental HCC827 cells harboring amplification of *EGFR* gene. Treatment with the multikinase inhibitor dasatinib or transfection with a *SRC* small interfering RNA inhibited cell survival and AKT phosphorylation in drug-resistant sublines to a greater extent compared with HCC827 cells. Further, the migration of drug-resistant cells was greater compared with that of HCC827 cells and was inhibited by dasatinib or an FAK inhibitor. These findings indicate that compensatory activation of SRC family kinases (SFKs) and FAK supports the survival and migration of afatinib-resistant cells when the expression of multiple EGFR family proteins was mostly abrogated. Combinations of potent drugs that target SFKs and FAK may overcome the resistance of lung cancer cells to second-generation TKIs.

## INTRODUCTION

Somatic mutations in the epidermal growth factor receptor (*EGFR*) gene that activate EGFR tyrosine kinase activity are major determinants of the clinical efficacy of first-generation EGFR tyrosine kinase inhibitors (TKIs) such as gefitinib and erlotinib that are used to treat patients with non-small cell lung cancer (NSCLC) [1-5]. Treatment with EGFR-TKIs benefits most patients with NSCLC with activating EGFR mutations, although their final clinical efficacy varies, because tumors develop resistance [6]. The acquired resistance to EGFR-TKIs is mediated through pleiotropic changes of *EGFR* gene and bypass signaling molecules [6-15]. The EGFR T790M mutant is most often responsible for mediating resistance to gefitinib and erlotinib [15].

Multikinase-targeted irreversible second-generation EGFR-TKIs such as afatinib that targets EGFR T790M have been further developed to overcome resistance to EGFR-TKIs of patients with relapsed NSCLC [6, 16-18]. Further, targeting EGFR and its family members using a combination of afatinib and cetuximab achieved improved therapeutic efficacies against acquired drug-resistant lung cancers with or without the EGFR T790M mutation [19]. Moreover, EGFR T790M-mediated drug resistance is overcome, even partially, using afatinib or other second-generation TKIs alone in preclinical models [15, 20]. The irreversible third-generation EGFR-TKI osimertinib that targets EGFR T790M shows promising responses against an activated mutant EGFR with a T790M mutation in a tumor xenograft model as well as in a clinical trial [21]. The therapeutic efficacy of osimertinib is therefore expected to provide benefits against EGFR T790M-driven acquired drug-resistant tumors [6]. For example, osimertinib is highly active in patients with lung cancer with the EGFR T790M mutation who experience disease progression during prior therapy using EGFR-TKIs [22].

Second- and third-generation receptor TKIs in combination or alone show promise for improving therapeutics against lung tumors that are refractory to erlotinib and gefitinib [22, 23]. However, the appearance of tumors resistant to EGFR T790M-targeted drugs such as osimertinib, WZ4002, and rociletinib has continuously caused serious problems for treating patients with lung cancer [6]. Moreover, further introduction of novel mutations including C797S in the TK domains of EGFR, in addition to T790M and activating mutations such as L858R or exon19 deletion, is closely associated with acquired resistance to third-generation receptor TKIs, including osimertinib [24-26]. Further, acquired resistance to osimertinib is associated with RAS signaling in lung cancer cells harboring activating EGFR mutations with EGFR T790M [27] as well as the appearance of cancer cells harboring EGFR T790M with wild-type EGFR in refractory tumors [28].

We previously established afatinib-resistant sublines from the human lung cancer cell line PC9 that

harbors an activating EGFR mutation [29]. We found that expression of most EGFR family proteins in the afatinib-resistant sublines is decreased and is accompanied by activation of the FGF2/FGFR1-driven cell growth and survival signaling pathways [29]. In the present study, we further characterized afatinib-resistant sublines that were independently established from the human lung cancer cell line HCC827 harboring an activated mutant EGFR and amplification of *EGFR*. Here we report that activation of SRC family kinases SFKs and focal adhesion kinase (FAK) is responsible for the survival of afatinib-resistant cells when expression of multiple EGFR family proteins and other receptors is diminished. We discuss the potential utility of a combination of inhibitors of SFK, FAK, or both to overcome the resistance of cancer cells to multiple EGFR-TKIs.

## RESULTS

### Afatinib-resistant cells are resistant to EGFR-TKIs

We established two afatinib-resistant sublines, HCC827/BR1-8 (BR1-8) and HCC827/BR2-3 (BR2-3), after exposing the parental lung cancer cell line HCC827, which harbors a mutation of EGFR exon 19 (E746-A750) that activates tyrosine kinase activity, to step-wise increasing concentrations of afatinib up to 1  $\mu\text{mol/L}$  (see Materials and Methods). We were unable to isolate drug-sensitive revertants when these resistant sublines were continuously cultured for >11 months in the absence of afatinib. BR1-8 cells grew more sparsely, with fewer cell-cell contacts and exhibited a more fibroblast-like morphology compared with HCC827 or BR2-3 cells (Supplementary Figure 1A). The doubling times of HCC827, BR1-8, and BR2-3 cells were 27 h, 22 h, and 20 h, respectively.

Compared with HCC827 cells, the BR1-8 and BR2-3 were 1,000-fold more resistant to afatinib, gefitinib, and erlotinib; approximately 3-fold more resistance to lapatinib; and >150-fold more resistant to osimertinib (Figure 1A and Table 1). In contrast, the sensitivities of the sublines to picropodophyllin, SU11274, PD173074, AZD4547, sorafenib, BIBF1120 and cisplatin were similar to those of HCC827 cells (Figure 1A and Table 1). When HCC827 cells were exposed to afatinib at 100 nmol/L for 24 h or 48 h, flow cytometric analysis detected an increased population of apoptotic cells that accumulated at the sub-G1 phase of the cell cycle compared with the resistant sublines (Supplementary Figure 1B).

### The loss of multiple EGFR family proteins in afatinib-resistant cells

We next performed western blotting analysis to compare the levels of expression of growth factor receptors

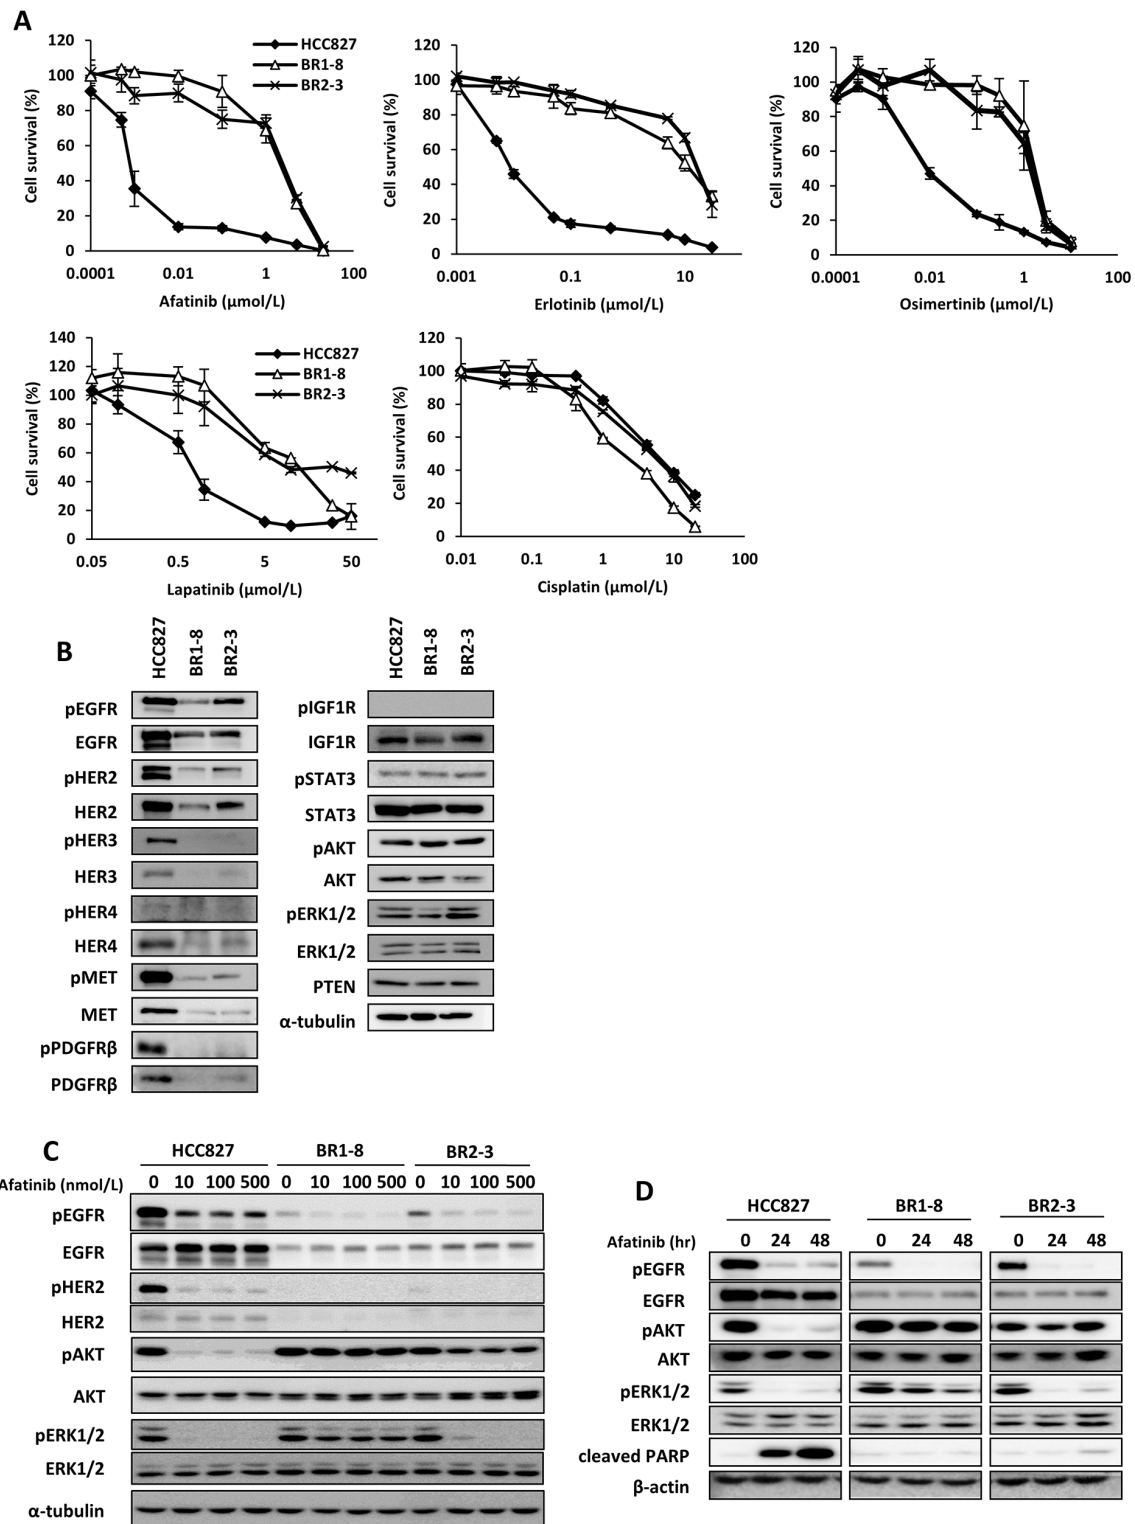

**Figure 1: Comparison of expression and activation of receptor tyrosine kinases and the down-stream signaling molecules in HCC827 cells and its drug-resistant sublines in the absence or presence of afatinib. (A)** The sensitivities of HCC827 and drug-resistant sublines to afatinib, erlotinib, osimertinib, lapatinib, and cisplatin. Cells were exposed to various concentration of afatinib for 72 h and subjected to a WST assay. **(B)** The expression and activation of receptor tyrosine kinases and downstream signaling molecules.  $\alpha$ -Tubulin served as the loading control. **(C)** Cells were treated for 6 h with various concentrations of afatinib. **(D)** Cells were exposed to afatinib (100 nmol/L) for 24 h or 48 h.

**Table 1: Comparison of sensitivities of HCC827 cells and its drug-resistant sublines to tyrosine kinase inhibitors targeting downstream signaling components and nonreceptor tyrosine kinases**

| Drugs            | Targets            | Relative drug resistance |       |       |
|------------------|--------------------|--------------------------|-------|-------|
|                  |                    | HCC827                   | BR1-8 | BR2-3 |
| Afatinib         | EGFR, HER2, HER4   | 1                        | 2613  | 3033  |
| Gefitinib        | EGFR               | 1                        | 1625  | 1850  |
| Erlotinib        | EGFR               | 1                        | 1306  | 1950  |
| Osimertinib      | EGFR               | 1                        | 167   | 154   |
| Lapatinib        | EGFR, HER2         | 1                        | 3.87  | 3.78  |
| picropodophyllin | IGF1-R             | 1                        | 1.0   | 1.1   |
| SU11274          | c-Met              | 1                        | 1.2   | 1.1   |
| PD173074         | FGFR1,3            | 1                        | 1.0   | 1.4   |
| AZD4547          | FGFR1,2,3,4        | 1                        | 1.0   | 1.1   |
| Sorafenib        | Raf, PDGFR, VEGFR  | 1                        | 1.1   | 0.9   |
| BIBF1120         | PDGFR, VEGFR, FGFR | 1                        | 1.2   | 1.8   |
| Cisplatin        | DNA                | 1                        | 0.3   | 0.9   |

IC50 values ( $\mu\text{mol/L}$ ) were calculated from the logit regression curves of triplicate dishes. The IC50 values for afatinib, gefitinib, erlotinib, osimertinib, lapatinib, picropodophyllin, SU11274, PD173074, AZD4547, sorafenib, BIBF1120, and cisplatin were as follows:  $0.00079 \pm 0.00005$ ,  $0.0078 \pm 0.001$ ,  $0.0087 \pm 0.0004$ ,  $0.0090 \pm 0.0019$ ,  $4.33 \pm 0.82$ ,  $0.61 \pm 0.04$ ,  $4.42 \pm 0.23$ ,  $11.50 \pm 0.32$ ,  $7.08 \pm 0.30$ ,  $5.50 \pm 0.55$ ,  $1.96 \pm 0.09$ , and  $5.55 \pm 1.34$  in HCC827,  $2.05 \pm 0.25$ ,  $12.60 \pm 0.716$ ,  $11.31 \pm 0.32$ ,  $1.50 \pm 0.50$ ,  $16.76 \pm 1.63$ ,  $0.61 \pm 0.04$ ,  $5.16 \pm 0.17$ ,  $12.04 \pm 2.31$ ,  $6.94 \pm 0.41$ ,  $6.06 \pm 0.21$ ,  $2.33 \pm 0.11$ , and  $1.90 \pm 0.33$  in BR1-8 cells, and  $2.38 \pm 0.31$ ,  $14.33 \pm 0.813$ ,  $16.97 \pm 0.76$ ,  $1.39 \pm 0.14$ ,  $16.38 \pm 1.28$ ,  $0.68 \pm 0.03$ ,  $5.04 \pm 0.08$ ,  $16.53 \pm 0.53$ ,  $7.67 \pm 0.40$ ,  $4.99 \pm 0.12$ ,  $3.5 \pm 0.4$ , and  $4.98 \pm 0.91$  in BR2-3 cells, respectively. Relative resistance was defined as the IC50  $\pm$  S.D. values divided by the IC50 values of the parental HCC827 cells.

and their downstream signaling components in HCC827 cells and the afatinib-resistant sublines (Figure 1B). The afatinib-resistant sublines expressed markedly decreased levels of EGFR, phosphorylated (p)EGFR, HER2, pHER2, HER3, pHER3, HER4, MET, pMET, PDGFR $\beta$ , and pPDGFR $\beta$  compared with HCC827 cells. There was no detectable change in the levels of IGF1R, STAT3, pSTAT3, AKT, pAKT, ERK1/2, pERK1/2, and PTEN among the three cell lines (Figure 1B).

We determined the effects of afatinib on the phosphorylation of EGFR, HER2, AKT and ERK1/2 (Figure 1C and 1D). Phosphorylation of EGFR and HER2 was inhibited by afatinib in HCC827 cells and the afatinib-resistant sublines as a function of its concentration (Figure 1C) as well as time (Figure 1D). In contrast, AKT phosphorylation was not detectably inhibited by afatinib in both resistant sublines, although AKT phosphorylation in HCC827 cells was completely inhibited (Figure 1C and 1D). Phosphorylation of ERK1/2 was inhibited by afatinib in all three cell lines, although ERK1/2 phosphorylation was slightly less sensitive to the inhibitory effects of afatinib in BR1-8 cells compared with HCC827 or BR2-3 cells. Apoptosis was induced in HCC827 cells upon exposure to afatinib, but not in BR1-8 and BR2-3 cells (Figure 1D).

### ***EGFR* is not amplified in afatinib-resistant cells**

The loss of the gene encoding constitutively activated mutant EGFR is required for resistance to EGFR-TKIs in lung cancer cells [30]. Western blot analysis revealed markedly decreased levels of delE746-A750 EGFR in the afatinib-resistant sublines (Figure 2A). PCR analysis of genomic DNA revealed that the band specific for *EGFR* exon 19 del was less intense compared with that of the wild-type exon 19 *EGFR* sequence in the resistant sublines (Figure 2B).

*EGFR* is amplified in HCC827 cells [31]. Therefore, we analyzed *EGFR* amplification in the afatinib-resistant sublines using an Oncoscan assay and fluorescence in situ hybridization (FISH). Figure 2C shows a karyoview of the *EGFR* coding region on chromosome 7 and its copy number. *EGFR* was amplified in HCC827 cells but not in the afatinib-resistant sublines. Consistent with the results of the Oncoscan assay, FISH analysis detected *EGFR* amplification in HCC827 cells (EGFR/chromosome 7 centromere [CEP7] = 6.7) and the loss of amplification in the afatinib-resistant sublines (EGFR/CEP7 = 0.6 and 0.8 in BR1-8 and BR2-3 cells, respectively) (Figure 2D).

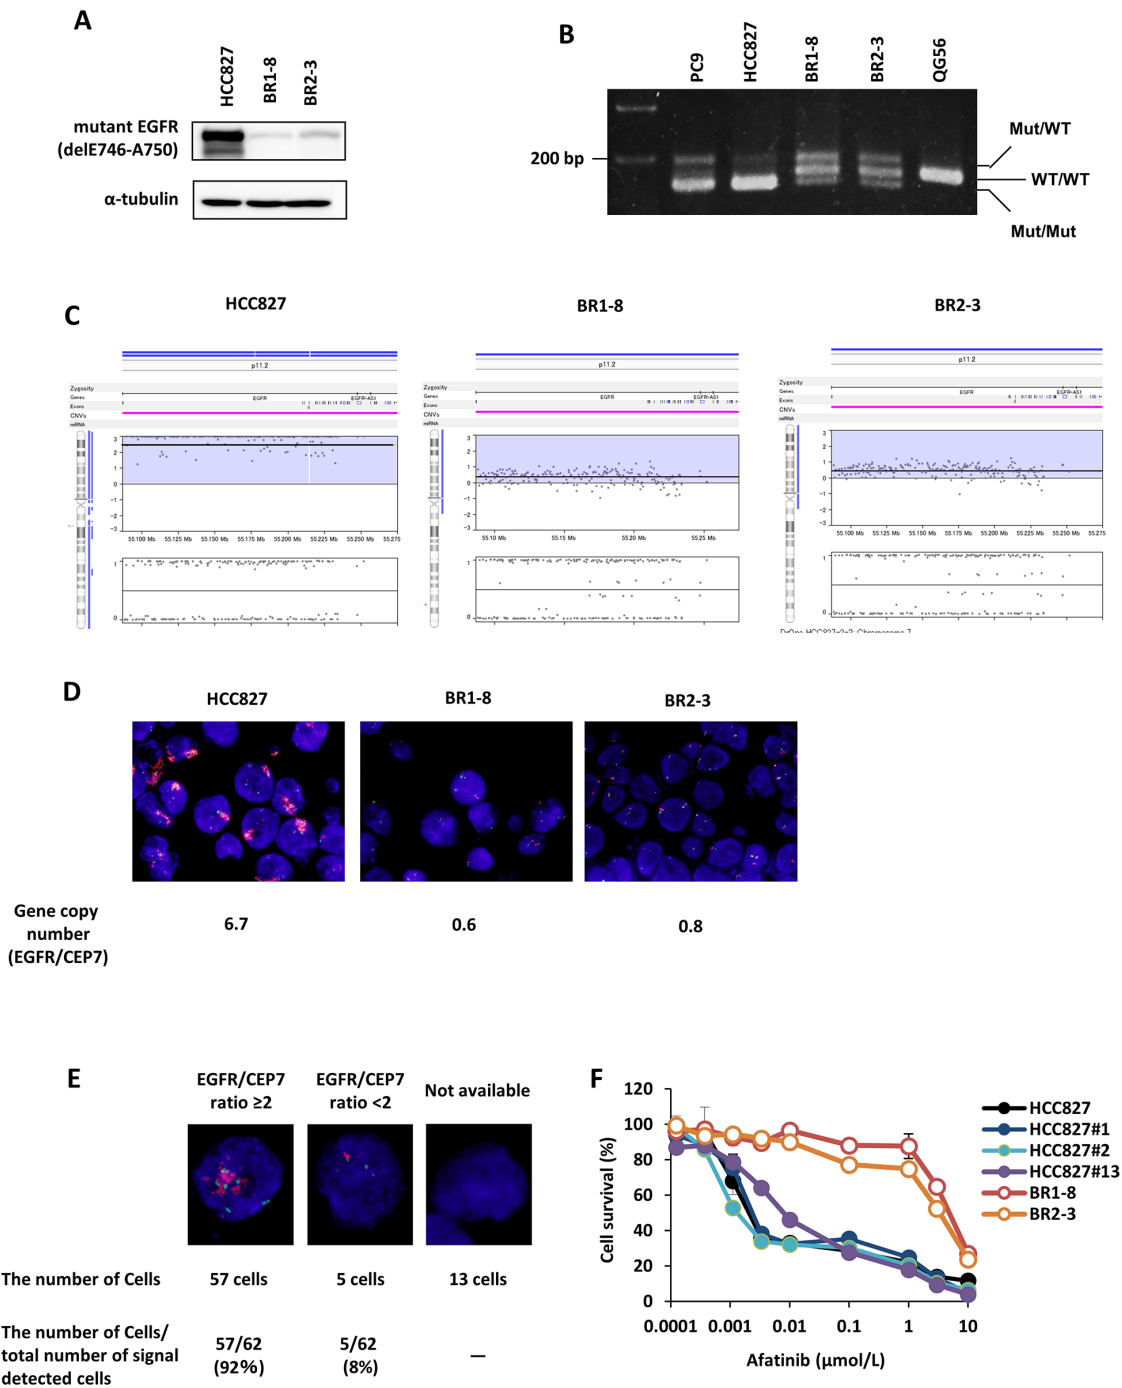

**Figure 2: EGFR gene amplification in drug-resistant sublines.** (A) Decreased expression of delE746-A750 EGFR in drug-resistant sublines compared with HCC827 cells. (B) Levels of mutant and wild-type *EGFR*. PCR analysis detected only mutant homoduplexes (Mut/Mut) in HCC827 cells, and wild-type (WT/WT) homoduplexes in QG56 cells harboring wild-type *EGFR*, and heteroduplexes (Mut/WT) and homoduplexes (WT/WT) and (Mut/Mut) in BR1-8, BR2-3, and PC9 cells harboring the *EGFR* delE746-A750 mutant. (C) Alterations of the coding region of *EGFR* on chromosome 7 in HCC827 cells and drug-resistant sublines were determined using an Oncoscan array. The upper and lower plots show  $\log_2$  ratios and B-allele frequencies, respectively. (D) FISH analysis using *EGFR* (red) and chromosome 7 centromere (CEP7) (green) probes of HCC827 cells and drug-resistant sublines. The number of the fluorescent signals corresponding to *EGFR* or CEP7 was counted, and the *EGFR/CEP7* ratio was calculated. (E) The presence and absence of *EGFR* gene amplification of 75 cells of HCC827 was assessed by using *EGFR* (red) and chromosome 7 centromere (CEP7) (green) probes. The number of the fluorescent signals corresponding to *EGFR* or CEP7 was counted. (F) Cellular sensitivity of three clones of HCC827 (#1, #2 and #13) with or without *EGFR* gene amplification to afatinib. Cells were exposed to various concentrations of afatinib for 72 h and viability was assessed using a WST assay.

Concerning the mechanism by which the loss of *EGFR* gene amplification is induced during selection by resistance to afatinib, one can further ask whether afatinib-resistant cells without *EGFR* gene amplification are selected from the parental HCC827 cell population with and without *EGFR* gene amplification. We further counted cell number with or without *EGFR* gene amplification in Figure 2E. Of all 75 cells, 57 showed *EGFR*/*CEP7* ratio >2, 5 showed *EGFR*/*CEP7* ratio <2, and 13 showed no fluorescent signal of *EGFR* and *CEP7* (Figure 2E). Furthermore, we independently cloned 10 cells from the parental HCC827 cells, and the absence or presence of gene amplification was analysed by FISH (Supplementary Table 1). Of the 10 clones, 9 clones showed *EGFR* gene amplification (*EGFR*/*CEP7* ratio >2), but 1 clone (#13) did not show gene amplification (*EGFR*/*CEP7* ratio <2) (Supplementary Table 1). Dose response curves to

afatinib of three clones, HCC827#1 (*EGFR* gene amplified), HCC827#2 (*EGFR* gene amplified) and HCC827#13 (*EGFR* gene unamplified) showed only a slight if any difference in their sensitivities to afatinib (Figure 2F). It is less likely that isolation of afatinib-resistant sublines, BR1-8 and BR2-3, is due to selection by the drug of cell population without *EGFR* gene amplification.

### Dasatinib inhibits cell survival and the phosphorylation of AKT and MAPK of afatinib-resistant sublines

Compensatory activation of SRC occurs in lung cancer cells with acquired resistance to *EGFR*-TKIs [32, 33]. The SFKs SRC and LCK were expressed at similar levels among the three cell lines (Figure 3A). Compared

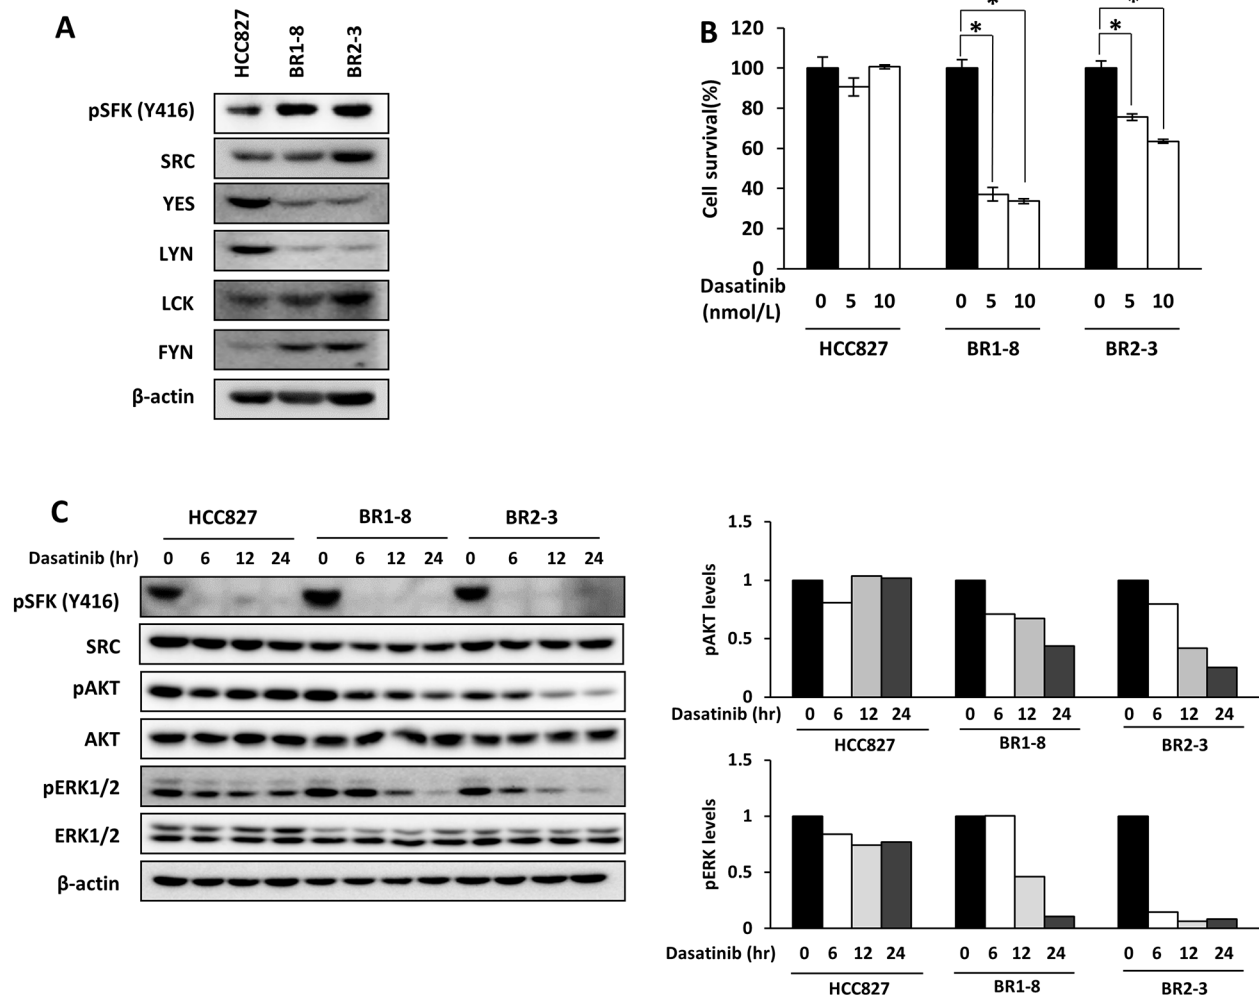

**Figure 3: The effect of dasatinib on AKT and ERK signaling in HCC827 cells and its drug-resistant sublines. (A)** The expression of SFK family proteins and activation of SFKs. **(B)** The inhibitory effects of dasatinib on cell survival of HCC827, BR1-8, and BR2-3 cells. Each value represents the average of triplicate dishes for each cell line. \* $P < 0.05$ . **(C)** Western blot analysis of the inhibitory effects of incubating cells with dasatinib (100 nmol/L) for 6, 12, and 24 h. The quantification of the western blots is shown, and the values were normalized to those of  $\beta$ -actin.

with HCC827 cells, the levels of LYN and YES were lower and those of FYN were higher in the afatinib-resistant sublines (Figure 3A). Afatinib-resistant sublines showed only a slight if any increase in pSFK levels as compared with those in HCC827 cells. We examined whether afatinib-resistant sublines showed altered sensitivity to a SFK inhibitor, dasatinib. Dasatinib inhibited the survival (Figure 3B) and the phosphorylation of AKT and ERK1/2 (Figure 3C) of the afatinib-resistant sublines to greater extents compared with HCC827 cells. The intracellular distributions of SRC, YES, LYN, LCK, and FYN in the cytosol, plasma membrane, and nucleus did not differ among the afatinib-resistant sublines and HCC827 cells (Supplementary Figure 2).

Afatinib inhibited the survival of HCC827 cell by 90% and that of the afatinib-resistant sublines by approximately 30% compared with the control (Figure 4A). Dasatinib inhibited the survival of HCC827 cells by approximately 10% and that of the afatinib-resistant sublines by 30%–50% compared with the control (Figure 4A). The combination of afatinib with dasatinib inhibited the survival of the afatinib-resistant sublines by approximately 60% (Figure 4A). Dasatinib did not inhibit AKT phosphorylation in HCC827 cells and, in contrast, inhibited AKT phosphorylation by approximately 30%–50% compared with the control in afatinib-resistant sublines (Figure 4B). SFK phosphorylation (Y416) was similarly inhibited by dasatinib in the three cell lines (Figure 4B). Coadministration of dasatinib and afatinib further inhibited AKT phosphorylation in the afatinib-resistant sublines compared with each drug alone (Figure 4B).

Knockdown of *SRC*, *FYN* and *LCK* by their cognate small interfering RNAs (siRNAs) inhibited the expression of SRC, FYN and LCK, respectively (Figure 4C). Of the three SFKs, only SRC knockdown inhibited SFK phosphorylation (Y416) in all three cell lines. However, SRC knockdown more specifically inhibited SFK phosphorylation in the resistant sublines than HCC827 (Figure 4C). *SRC* siRNA markedly and similarly inhibited the survival of the three cell lines, and the combination of afatinib and the *SRC* siRNA markedly inhibited the survival of the afatinib-resistant sublines compared with afatinib alone (Figure 4D).

### **Increased expression of FGFR1, EPHA4, and EPHA2 is not directly involved in afatinib-resistance**

We next determined whether other receptors could induce SRC activation in the drug-resistant sublines. We reported that in afatinib-resistant sublines derived from the lung cancer cell line PC9 that harbors an activating EGFR mutation, the levels of multiple EGFR family proteins are markedly reduced and accompanied by compensatory activation of an FGF2/FGFR1 autocrine signaling pathway

[29]. Although the drug-resistant sublines expressed higher levels of FGFR1 compared with HCC827 cells, they did not express increased levels of pFGFR (Supplementary Figure 3). Further, the sensitivities of HCC827 and the drug-resistant sublines to FGFR-TKIs, PD173074 and AZD4547, were similar (Supplementary Figure 3), suggesting that FGFR1 did not act as a driver oncogene in the afatinib-resistant sublines.

Dasatinib inhibits the activities of SFKs, EPH family members, ABL, PDGFR, and KIT [34]. Dasatinib targets EPHA4 [35, 36], and here we found that EPHA4 expression was markedly increased in the drug-resistant sublines compared with HCC827 cells (Supplementary Figure 4A). Transfection with an *EPHA4* siRNA did not inhibit the phosphorylation of AKT and ERK1/2 in BR1-8 and BR2-3 cells. EPHA4 knockdown inhibited the survival of HCC827 and BR2-3 cells by approximately 20% compared with the untreated control (Supplementary Figure 4B), and knockdown of EPHA4 expression did not inhibit the survival of BR1-8 cells. On the other hand, phosphorylation of EPHA2 promotes SRC activation [37] and is involved in the acquisition of resistance of lung cancer cells to EGFR-TKIs [38]. Compared with HCC827 cells, the levels of EPHA2 were higher in BR1-8 cells and similar in BR2-3 cells (Supplementary Figure 4C). An *EPHA2* siRNA inhibited cell survival by approximately 20%–40% in the three cell lines compared with the control (Supplementary Figure 4D), and when combined with afatinib, the *EPHA2* siRNA did not affect the survival of resistant cells compared with afatinib alone (Supplementary Figure 4D).

### **Increased FAK activation in afatinib-resistant sublines that migrate more extensively compared with the parental cells**

FAK is closely associated with SFKs [39], and the SFK/FAK signaling pathway controls cell motility, invasion, survival, and drug resistance [32, 39, 40]. Phosphorylation of FAK (Y397, Y576/577, and Y925) in BR1-8 and BR2-3 cells was increased compared with that detected in HCC827 cells (Figure 5A). Of these phosphorylation sites, phosphorylation of Y925 was not apparently seen in HCC827 (Figure 5A, 5B, and 5D). Dasatinib inhibited phosphorylation of SFK phosphorylation (Y416), resulting in suppression of FAK (Y576/Y577) and FAK (Y925) phosphorylation in BR1-8 and BR2-3 cells (Figure 5B). Phosphorylation of FAK (Y576/Y577) was inhibited by dasatinib not only in resistant sublines but also in HCC827 cells. Phosphorylation of FAK (Y397) was slightly decreased by dasatinib in the parental HCC827 cells, but FAK phosphorylation (Y397) was increased in both resistant sublines by dasatinib (Figure 5B). The migration of drug-resistant sublines was >10-fold higher compared with that of HCC827 cells and was significantly inhibited in the

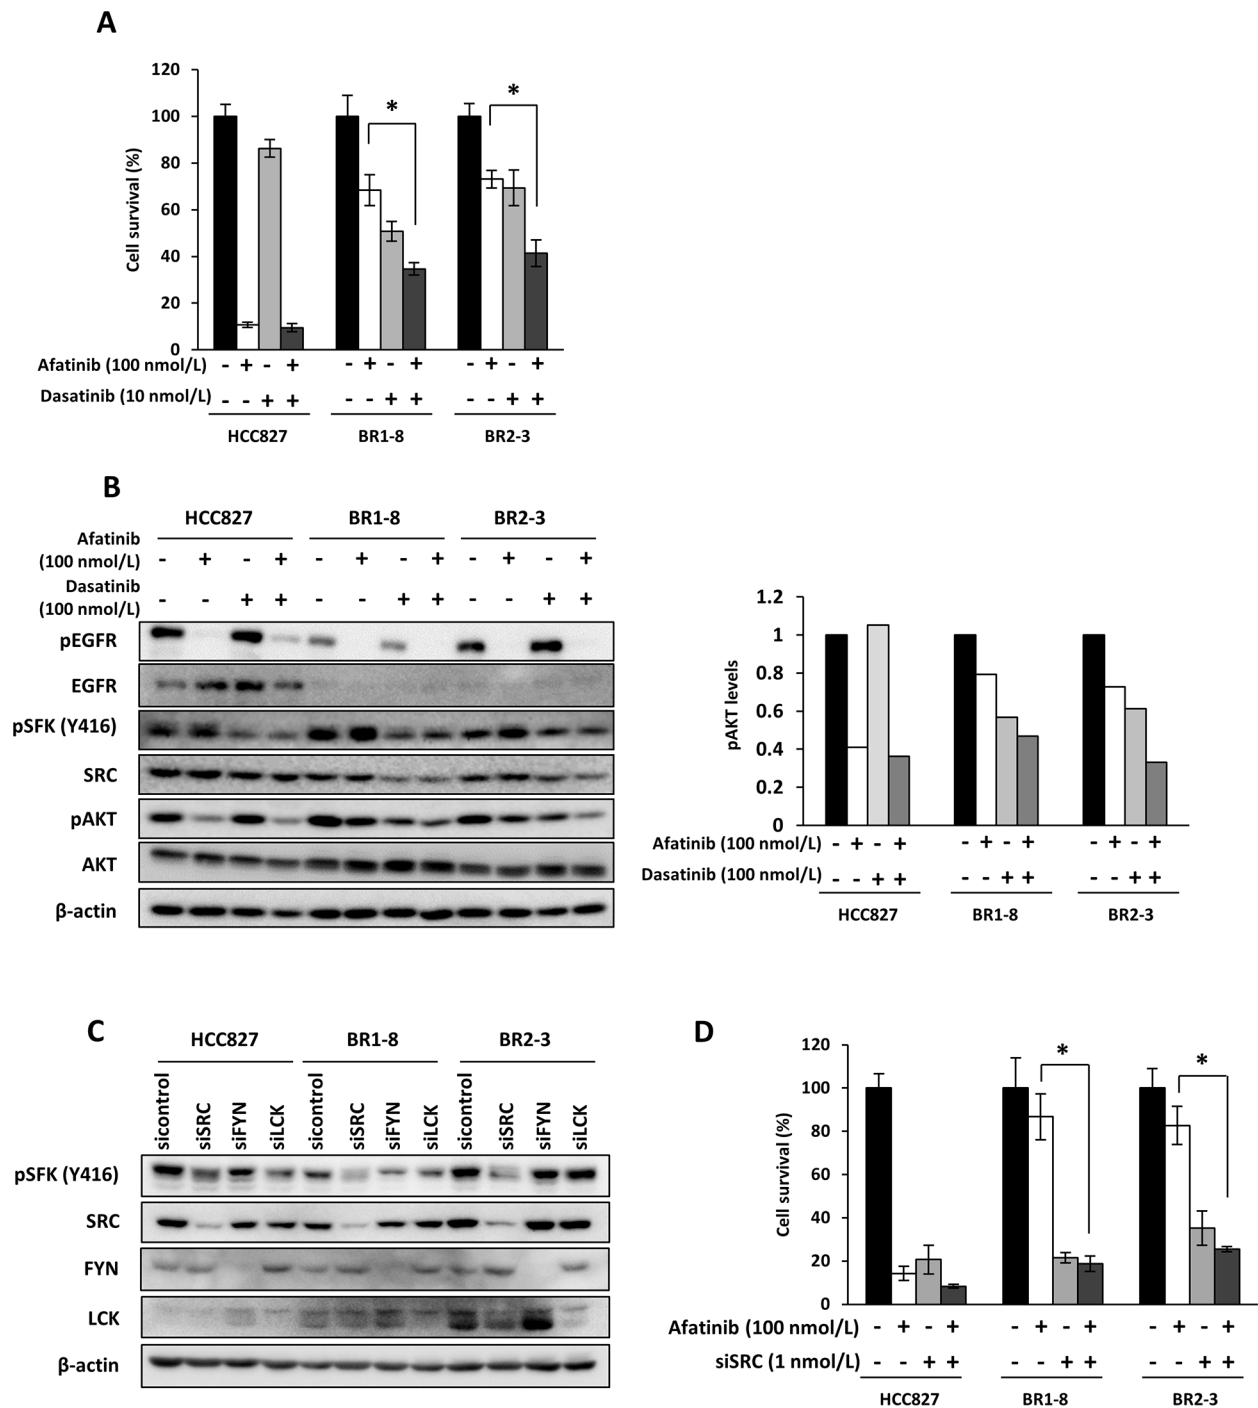

**Figure 4: Coadministration of afatinib with dasatinib or administration of afatinib to cells transfected with a *SRC* siRNA on the survival of drug-resistant sublines. (A) Sensitivity to dasatinib with or without afatinib. Cells were exposed for 72 h and subjected to a WST assay. \* $P < 0.05$  vs afatinib and dasatinib treatment. (B) The inhibitory effect of afatinib, dasatinib, or both on AKT activation. Cells were exposed to afatinib (100 nmol/L), dasatinib (100 nmol/L), or both for 6 h. (C) The expression of pSFK, SRC, FYN and LCK after cells were transfected with a cognate siRNA. Cells were treated with various amounts of siRNA for 72 h. (D) The effect of the *SRC* siRNA on the sensitivities of cells to afatinib. Cells were transfected with the *SRC* siRNA (1 nmol/L) for 48 h and then treated with afatinib (100 nmol/L) for 72 h. Each value represents the average of triplicate dishes for each assay. \* $P < 0.05$  vs *SRC* siRNA and afatinib treatment.**



presence of dasatinib (Figure 5C). Since cell migration is often associated with activation of SFK and FAK [41], increased migration of resistant cell might be attributed to the activation of SFK and FAK.

Cell growth and AKT phosphorylation are suppressed by inhibition of FAK [42]. The kinetics of siRNA-mediated FAK knockdown shows that the phosphorylation of FAK (Y397 and Y576/577) was inhibited by siFAK in HCC827 and the drug-resistant sublines (Figure 5D). The phosphorylation of SFKs and ERK1/2 was inhibited 72 h and 96 h after siFAK transfection of the three cell lines and was followed by inhibition of AKT phosphorylation at 96 h. AKT phosphorylation was inhibited to a greater extent in siFAK-transfected BR1-8 and BR2-3 cells compared with HCC827 cells (Figure 5D).

We next determined whether siFAK or a FAK inhibitor inhibited the survival and migration of the afatinib-resistant sublines. The survival of drug-resistant sublines transfected with siFAK was reduced by 40%–50% and that of HCC827 cells by 10% compared with the controls (Figure 5E). The survival of the drug-resistant cells treated with afatinib and simultaneously transfected with siFAK was inhibited by >50% (Figure 5E).

FAK activation promotes cell migration and invasion [41]. Therefore, we determined whether a FAK inhibitor inhibited the migration of the drug-resistant sublines. VS-4718 was shown to inhibit the FAK activity of cancer cells [43]. The sensitivities of afatinib-resistant sublines to VS-4718 were similar to those of HCC827 cells (data not shown). The migration of the drug-resistant sublines was 10-fold higher compared with that of HCC827 cells. VS-4718 significantly ( $p < 0.05$ ) inhibited the migration of BR1-8 cells and also that of BR2-3 cells ( $p = 0.07$ ) (Figure 5F). Together, the data indicate that activation of the SFK/FAK pathway is the main mechanism of survival and migration of afatinib-resistant cells.

## DISCUSSION

HCC827 cells harboring an activating EGFR mutation are highly susceptible to EGFR-TKIs, and the afatinib-resistant sublines derived here from HCC827 cells showed the characteristics as follows: (1) The levels of EGFR, an activated mutant EGFR, HER2, HER3, HER4, MET, and PDGFR $\beta$  were reduced compared with those of the parental cells, and *EGFR* amplification was lost. (2) AKT phosphorylation was inhibited by the SFK inhibitor dasatinib but not by afatinib, and administration of afatinib together with dasatinib or to SRC-knockdown cells further inhibited AKT phosphorylation and cell survival. (3) FAK and SFKs were more highly activated and cell survival and migration as well as AKT phosphorylation were inhibited by FAK knockdown. On the other hand, a clinical study has reported that the EGFR-T790M mutation is present in patients with

lung tumors refractory to treatment with afatinib [44]. However, we did not detect the EGFR-T790M mutation in BR1-8 and BR2-3 (unpublished data), suggesting that the T790M mutation does not contribute to the afatinib-resistance of BR1-8 and BR2-3 cells. Together, these data indicate that acquisition of afatinib resistance was likely caused by the loss of amplification of activated mutant EGFR. The survival and migration of the afatinib-resistant cells was likely mediated by the activities SFK/FAK-driven AKT and ERK signaling pathways (Figure 6). Concerning how SFK/FAK is activated by afatinib-resistance, we could not detect any mutation in *SFK* and *FAK* as well as *Eph* family, *ABL*, *PDGFR* and *KIT* (unpublished data).

Afatinib-resistant H1975 cells harboring an activated mutant EGFR and the T790M mutation express increased levels of KIT and MET in a mouse xenograft model, and combined knockdown of HER3, KIT, and MET causes cell death [45]. The combination of afatinib with dasatinib or amuvatinib, a KIT and MET inhibitor, overcomes afatinib-resistance, suggesting that compensatory activation of HER3 and SRC are likely involved in the acquired drug-resistance of tumors [45]. We previously reported that both the loss of activated mutant EGFR and the compensatory activation to other EGFR family proteins, HER2 and HER3, are involved in acquired EGFR-TKI resistance [30]. The present study shows that inhibition of SRC by dasatinib or a *SRC* siRNA inhibited the survival of the afatinib-resistant sublines when the expression of multiple EGFR family proteins, MET, and PDGFR $\beta$  is markedly reduced. Afatinib-resistant sublines thus attenuates the cell growth and survival signaling pathways driven by the activated mutant EGFR as well as by HER2, HER3 and MET, and their cell growth and survival newly depend on compensatory activation of SFK/FAK signaling pathway (See Figure 6).

We found previously that integrin $\beta$ 1-driven SRC activation is involved in enhanced cell migration and invasiveness as well as the acquisition erlotinib-resistance in human lung cancer cells harboring activated mutant EGFR, and integrin $\beta$ 1 knockdown or inactivation overcomes drug resistance [33]. The afatinib-resistant sublines studied here, however, did not express activated integrin $\beta$ 1, and integrin $\beta$ 1 knockdown did not affect SFK phosphorylation or cell survival (unpublished data), suggesting that it is less likely that the integrin $\beta$ 1/SRC/AKT axis is involved in the acquisition of afatinib resistance.

SRC is a nonreceptor TK that functions as a cotransducer of signals generated by transmembrane growth factor receptors such as EGFR, and SRC plays a critical role in EGFR-induced cell growth and surviving signaling [46]. Seven of nine SRC family kinase genes are included among 18 genes that encode proteins that modify the EGFR-dependent cell growth and survival of lung cancer cells that harbor an activated mutant EGFR, [47],

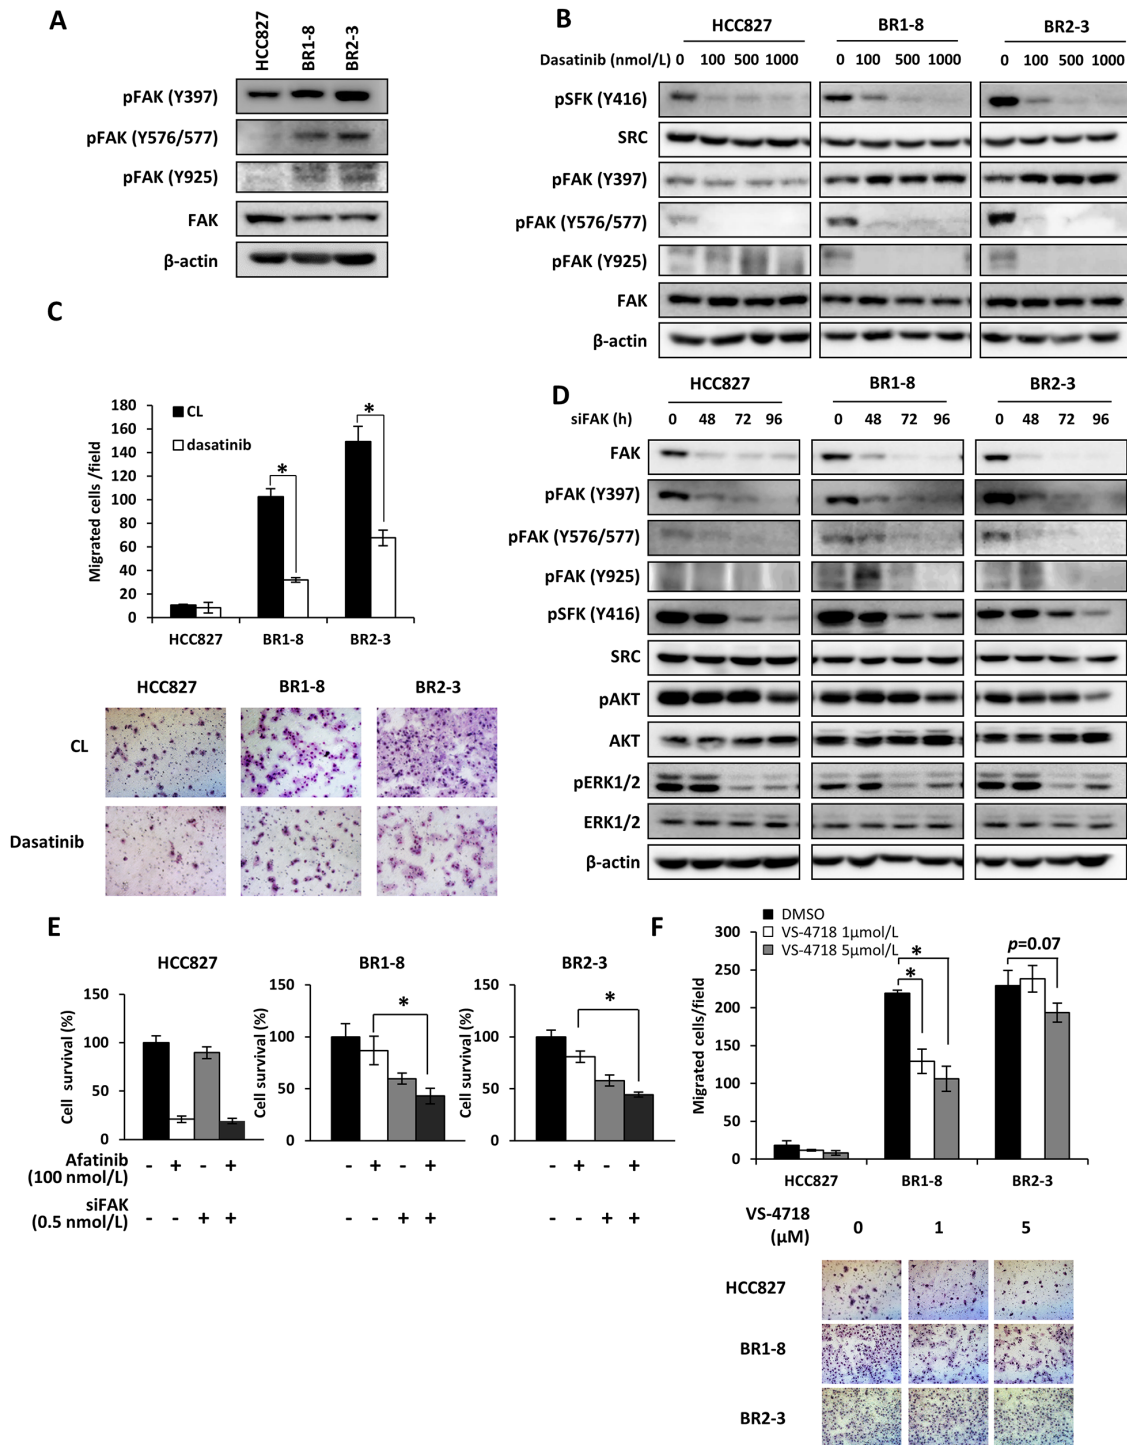

**Figure 5: FAK activation in association with SRC in drug-resistant sublines.** (A) The expression and activation of FAK.  $\beta$ -Actin served as a loading control. (B) The inhibitory effects of dasatinib on FAK activation. Cells were exposed to dasatinib for 6 h. (C) Migration of HCC827 cells and drug-resistant sublines. Migration was determined using transwell assays in the presence or absence of without dasatinib for 6 h. Each value represents the average of triplicate dishes for each assay.  $*P < 0.05$  vs dasatinib treatment. (D) Effects of a *FAK* siRNA on activation of downstream signaling molecules. Cells were treated with a *FAK* siRNA (0.5 nmol/L) for various times. (E) Effects of a *FAK* siRNA on sensitivity to afatinib. Cells were exposed to *FAK* siRNA (0.5 nmol/L) for 48 h and then treated with afatinib (100 nmol/L) for 72 h.  $*P < 0.05$  vs *FAK* siRNA and afatinib treatment. (F) Inhibitory effects of VS-4718 on cell migration. Migration was determined using a transwell assay in the presence or absence of VS-4718 for 6 h.  $*P < 0.05$  vs DMSO treatment.

suggesting EGFR-independent activation of the MEK/ERK and PI3K/AKT signaling pathways [6]. EGFR-independent SRC is also activated in other EGFR-TKI-resistant lung cancer cells, and dasatinib together with EGFR-TKIs overcomes drug resistance [48]. Our present study demonstrates that afatinib-resistant cells were more susceptible to the cytotoxic effects of dasatinib or SRC knockdown. Of several SRC family genes, knockdown of SRC specifically suppressed SFK activation (pSFK Y416) in BR1-8 and BR2-3 cells, suggesting that SRC is one potent gene involved in the survival of afatinib-resistant cells (Figure 4C).

Further, knockdown of SRC inhibited the survival of afatinib resistant sublines as well as their parental HCC827 cells, and Src signaling also contributes to the survival of HCC827 cells. Dasatinib inhibited cell growth and AKT phosphorylation more strongly in afatinib resistant sublines than HCC827 cells (Figure 3B and 3C), suggesting again that the survival of afatinib resistant sublines more depend on Src signaling. However, dasatinib did not completely inhibit Akt phosphorylation in afatinib resistant sublines, suggesting that other unknown molecules in addition to SFK might be also involved in the cell survival of afatinib resistant sublines. Identification of molecule other than SFK/FAK which may contribute to cell survival of afatinib resistant sublines should be further required.

BR1-8 and BR2-3 cells showed markedly enhanced migration compared with HCC827 as well as relatively higher levels of FAK phosphorylation. Cell migration is closely associated with activation of SFK and FAK [41] and FAK functions downstream or upstream of SFKs [39]. In erlotinib-resistant cells undergoing the epithelial-mesenchymal transition, an SFK/FAK signaling pathway is key for cell survival [40]. SFKs and FAK interact in cancer cells to drive signaling pathways that mediate cell growth, survival, and migration. Further, the migration of drug-resistant cells was blocked by the FAK inhibitor VS-4718 as well as by dasatinib, suggesting that activation of SFK and FAK promotes cell migration as well as cell growth/survival by afatinib resistant sublines (Figure 6).

In conclusion, acquired resistance to the multi-EGFR family TKI afatinib was closely associated with the loss of amplification of *EGFR* harboring an activating mutation as well as with reduced levels and activities of other growth factor receptors. Further, we detected constitutive activation of SFKs/FAK that promoted the growth, survival, and migration of afatinib-resistant cells. Treatment with the SFK inhibitor dasatinib partially overcame afatinib resistance through suppression of the SFK/FAK-AKT axis and/or the SFK/FAK-ERK axis. SFK/FAK activation may therefore play a key role in growth, survival, and migration of afatinib-resistant cells.

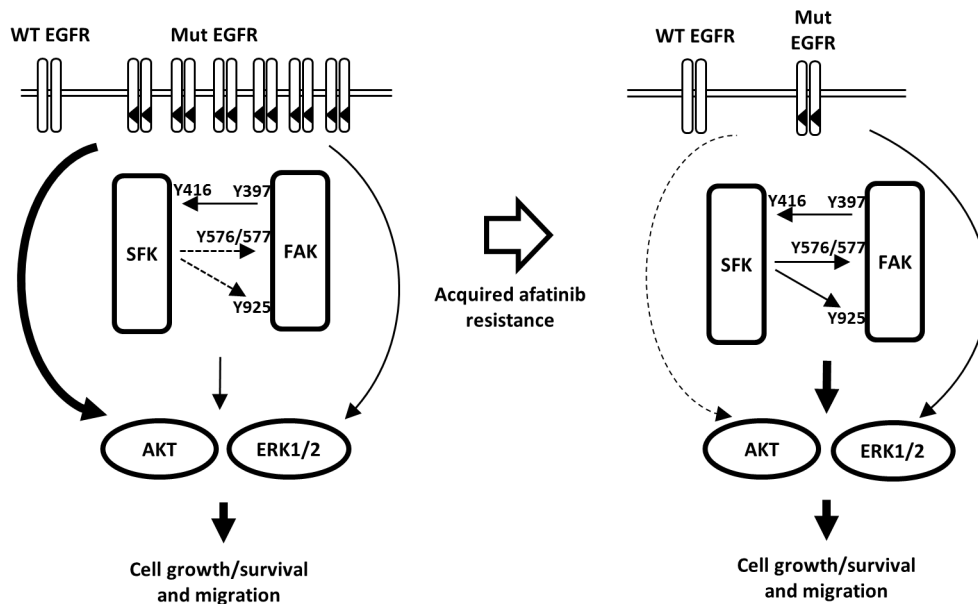

**Figure 6: Hypothetical model illustrating the mechanism of acquisition of resistance to afatinib and the role of SFK/FAK signaling in mediating cell growth and survival.** Cell growth and survival of the parental drug-sensitive cell harboring activated mutant EGFR depends upon an amplified activated EGFR-driven PI3K/AKT pathway that is highly susceptible to afatinib. In contrast, in afatinib drug-resistant cells, expression of the activated mutant EGFR is markedly reduced because of the loss of EGFR gene amplification. Conversely, SFK/FAK activation contributes to growth, survival, and migration of afatinib-resistant cells.

## MATERIALS AND METHODS

### Generation and culture of afatinib-resistant sublines derived from HCC827 cells

PC9 was kindly provided by Dr. Yukito Ichinose (National Hospital Organization Kyushu Cancer Center, Fukuoka, Japan) [49]. HCC827 was purchased from the American Type Culture Collection. PC9 and HCC827 were not further tested or authenticated by the authors. These lung cancer cell lines were maintained in RPMI medium supplemented with 10% fetal bovine serum (FBS) and incubated in a humidified atmosphere containing 5% CO<sub>2</sub> at 37°C. Afatinib-resistant sublines were established from HCC827 cells as previously described [8, 29, 30]. We cultured HCC827 cells in increasing, step-wise concentrations of afatinib up to 1 μmol/L over the following 11 months. We independently cloned two afatinib-resistant sublines from two dishes and designated them HCC827/BR1-8 and HCC827/BR2-3. The identities of these sublines were confirmed by analyzing their short tandem repeat profiles using the Cell ID System (Promega, Madison, WI). All cell lines were passaged for ≤6 months.

### Reagents

Erlotinib was kindly provided by F. Hoffman-La Roche Ltd, gefitinib was provided by AstraZeneca Inc; VS-4718 was provided by Verastem Inc; afatinib, osimertinib, lapatinib, AZD4547, and BIBF1120 were purchased from Selleck Chemicals; SU11274 and picropodophyllin were from Carbiochem; dasatinib was from Bio Vision; SB203580 was from Cayman Chemical; sorafenib was acquired from Toronto Research Chemicals Inc, cisplatin was from Bristol-Myers Squibb Company; and PD173074 was from Sigma-Aldrich.

Anti-HER2 and anti-pHER2 antibodies were purchased from Merck Millipore Corporation, anti-EGFR, anti-pEGFR, anti-pHER3, anti-HER4, anti-pHER4, anti-pc-Met, anti-IGF1Rβ, anti-pIGF1Rβ, anti-PDGFRβ, anti-pPDGFRβ, anti-FGFR1, anti-pFGFR, anti-ERK1/2, anti-pERK1/2, anti-AKT, anti-pAKT, anti-STAT3, anti-pSTAT3, anti-PTEN, anti-SRC, anti-FYN, anti-LYN, anti-YES, anti-LCK, anti-pSRC family (Y416), anti-pSRC (Y527), anti-FAK, anti-pFAK (Y397), anti-pFAK (Y576/577), anti-pFAK (Y925) and anti-EGFR (del E746-A750) antibody were from Cell Signaling Technology, anti-HER3 and anti-c-Met were from Santa Cruz Biotechnology Inc, anti-β-actin was from Abcam, Inc., and anti-α-tubulin was from Sigma-Aldrich.

### Western blot analysis

The cells were rinsed twice with ice-cold PBS and then lysed in Triton X-100 buffer (50 mmol/L HEPES, 150 mmol/L NaCl, 50 mmol/L NaF, 1% Triton X-100,

and 10% glycerol containing 5 mmol/L EDTA, 1 mmol/L phenylmethylsulfonyl fluoride, 10 μg/mL aprotinin, 10 μg/mL leupeptin, and 1 mmol/L sodium orthovanadate). The proteins in the cell lysates were separated using SDS-PAGE and electrophoretically transferred to Immobilon membranes (Millipore Corp.) [30].

### WST assay

Cells were plated in 96-well flat-bottom plates and cultured for 24 h before exposure to various concentrations of drugs for 72 h at 37°C. Cell Count Reagent SF (15 μL) (Nacalai Tesque) was added to each well, and the plates were incubated for 2 to 3 h at 37°C. Absorbance was measured at 450 nm using a 96-well plate reader. Triplicate wells were tested at each drug concentration. The IC<sub>50</sub> value was defined as the concentration that reduced absorbance by 50% and was calculated from the survival curves.

### PCR analysis

To analyze the deletion mutation, EGFR exon 19 was amplified using TaKaRa ExTaq polymerase and the PCR primers as follows: forward primer 5'-ATGTGGCACCATCTCACAATTGCC-3', reverse primer 5'-CCACACAGCAAAGCAGAAACTCAC-3'.

### RNA interference assays

Cells were transfected with siRNA duplexes in the presence of Lipofectamine RNAiMAX and Opti-MEM medium (Thermo Fisher Scientific Inc) according to the manufacturer's recommendations. siRNAs targeting the mRNAs encoding SRC, FAK, FYN, LCK, EPHA2, EPHA4 as well as a nonspecific (control) were purchased from Thermo Fisher Scientific Inc.

### Flow cytometry

Cells were treated with afatinib for 24 h or 48 h before flow cytometry analysis. Cells were washed twice with cold PBS, harvested, and stained with propidium iodide (Cycletest Plus DNA kit, Becton-Dickinson). Flow cytometry was conducted using a FACS Calibur System (Becton-Dickinson and Company).

### Cell migration assay

Serum-induced cell migration assays were performed using a multiwell chamber as the outer chamber with 8-μm polycarbonate filters. Cells at (2.0 × 10<sup>6</sup> cells) in serum-free RPMI with or without dasatinib were seeded in the inner chamber, and 10% FBS was added to the outer chamber. After 6 h incubation, cells that migrated under the filter were counted.

## FISH analysis of EGFR copy number

Gene copy number per cell was investigated using FISH with an LSI EGFR SpectrumOrange/CEP 7 SpectrumGreen probe (Vysis Inc, Abbott Laboratories, IL) dual probe cocktail. One slide of each cytological sample was subjected to hybridization reactions. The specimen underwent pretreatment with 0.2 M HCl at room temperature for 20 min and then in sodium citrate buffer ( $2 \times$  SSC, pH 6.0) at 80°C for 30 min. The specimens were digested using Proteinase K (ready to use, Dako Cytomation, Denmark) diluted 6-times with  $2 \times$  SSC at room temperature for 10 min, rinsed in sodium citrate buffer for 5 min, and dehydrated in ethanol for 2 min. After the dual-color LSI EGFR SpectrumOrange/CEP 7 SpectrumGreen probe was applied to the dry specimen, a coverslip was placed over the area containing the cells and sealed with rubber cement. The specimens were then incubated in a hybridizer (Dako Cytomation, Denmark) and subjected to denaturation at 95°C for 5 min and hybridization at 37°C for approximately 16 h. After hybridization, the samples were washed using  $2 \times$  SSC/0.3% NP-40 at  $72 \pm 1^\circ\text{C}$  for 2 min after the addition of 10  $\mu\text{L}$  of mounting medium containing 4',6'-diamidino-2-phenylindole to the cell area that was then protected using a coverslip. The EGFR Spectrum Orange/chromosome 7 spectrum green signals were counted in a minimum of 20 cells using a fluorescence microscope (BX 51, Olympus, Japan). EGFR amplification was defined as an EGFR Spectrum Orange/chromosome 17 spectrum green signal ratio  $>2.0$ .

## Isolation of genomic DNA

Genomic DNA was extracted using the QIAamp DNA Mini Kit (Qiagen). The quality and quantity of the DNA were verified using a NanoDrop 1000 (ThermoFisher Scientific).

## Array comparative genomic hybridization

Genomic DNA was subjected to the OncoScan FFPE Assay (Affymetrix) according to the manufacturer's protocol. DNA (80 ng) was annealed with molecular inversion probes (MIPs) for 16–18 h, followed by enzymatic digestion and a gap-fill reaction. The circular MIP probes were linearized using a restriction enzyme and amplified using PCR. PCR products were enzymatically cleaved and fragmented followed by hybridized onto the OncoScan array. After hybridization for 16–18 h, arrays were stained and washed using the GeneChip Fluidics Station 450 and loaded into a GeneChip Scanner 3000 7G (Affymetrix). Array fluorescence intensity (CEL) files were generated using the Affymetrix GeneChip Command Console software version 4.1. The CEL files were converted to OSCHP files using OncoScan Console 1.3 Software. The OSCHP file was analyzed using the

TuScan algorithm and Nexus Express for OncoScan software version 3.1 (Biodiscovery, Inc.).

## Cell fractionation assay

Cells were seeded and harvested for 3 days. Cell fractionation was performed using Subcellular Protein Fractionation Kit for Cultured Cells (Thermo Scientific Inc.) according to the manufacturer's recommendations.

## Author contributions

Performed research and contribution to the acquisition of the data: Y. Murakami, K. Sonoda, K. Azuma, K. Watari, D. Kusakabe, J. Akiba, C. Oneyama, H. Abe, A. Kawahara, J. A. Pachter, K. Sakai, and K. Nishio.

Designed the research study: Y. Murakami, K. Sonoda, M. Kuwano, and M. Ono.

Analyzed the data: Y. Murakami, K. Sonoda, K. K. Watari, H. Abe, A. Kawahara, K. Sakai, and K. Nishio.

Drafted the manuscript: Y. Murakami, K. Sonoda, K. Sakai, M. Kuwano, and M. Ono.

## CONFLICTS OF INTEREST

The authors declare no potential conflicts of interest.

## FUNDING

This study was supported by a special research fund (M.O.) from Life Science Foundation of Japan (2014).

## REFERENCES

1. Lynch TJ, Bell DW, Sordella R, Gurubhagavatula S, Okimoto RA, Brannigan BW, Harris PL, Haserlat SM, Supko JG, Haluska FG, Louis DN, Christiani DC, Settleman J, et al. Activating mutations in the epidermal growth factor receptor underlying responsiveness of non-small cell lung cancer to gefitinib. *N Engl J Med.* 2004; 350: 2129-39.
2. Paez JG, Jänne PA, Lee JC, Tracy S, Greulich H, Gabriel S, Herman P, Kaye FJ, Lindeman N, Boggon TJ, Naoki K, Sasaki H, Fujii Y, et al. EGFR mutations in lung cancer: correlation with clinical response to gefitinib therapy. *Science.* 2004; 304: 1497-500.
3. Pao W, Miller V, Zakowski M, Doherty J, Politi K, Sarkaria I, Singh B, Heelan R, Rusch V, Fulton L, Mardis E, Kupfer D, Wilson R, et al. EGF receptor gene mutations are common in lung cancers from “never-smokers” and are associated with sensitivity of tumors to gefitinib and erlotinib. *Proc Natl Acad Sci U S A.* 2004; 101: 13306-11.
4. Ono M, Kuwano M. Molecular mechanisms of epidermal growth factor receptor activation and response to gefitinib and other EGFR-targeting drugs. *Clin Cancer Res.* 2006; 12: 7242-51.

5. Maemondo M, Inoue A, Kobayashi K, Sugawara S, Oizumi S, Isoke H, Gemma A, Harada M, Yoshizawa H, Kinoshita I, Fujita Y, Okinaga S, Hirano H, et al. Gefitinib or chemotherapy for non-small cell lung cancer with mutated EGFR. *N Engl J Med.* 2010; 362: 2380-8.
6. Kuwano M, Sonoda K, Murakami Y, Watari K, Ono M. Overcoming drug resistance to receptor tyrosine kinase inhibitors: learning from lung cancer. *Pharmacol Ther.* 2016, 161: 97-110.
7. Engelman JA, Zejnullahu K, Mitsudomi T, Song Y, Hyland C, Park JO, Lindeman N, Gale CM, Zhao X, Christensen J, Kosaka T, Holmes AJ, Rogers AM, et al. MET amplification leads to gefitinib resistance in lung cancer by activating ERBB3 signaling. *Science.* 2007; 316: 1039-43.
8. Yamamoto C, Basaki Y, Kawahara A, Nakashima K, Kage M, Izumi H, Kohno K, Uramoto H, Yasumoto K, Kuwano M, Ono M. Loss of PTEN expression by blocking nuclear translocation of EGR1 in gefitinib-resistant lung cancer cells harboring epidermal growth factor-activating mutations. *Cancer Res.* 2010; 70: 8715-25.
9. Maeda M, Murakami Y, Watari K, Kuwano M, Izumi H, Ono M. CpG hypermethylation contributes to decreased expression of PTEN during acquired resistance to gefitinib in human lung cancer cell lines. *Lung Cancer.* 2015; 87: 265-271.
10. Morgillo F, Kim WY, Kim ES, Ciardiello F, Hong WK, Lee HY. Implication of the insulin-like growth factor-IR pathway in the resistance of non-small cell lung cancer cells to treatment with gefitinib. *Clin Cancer Res.* 2007; 13: 2795-803.
11. Cortot AB, Repellin CE, Shimamura T, Capelletti M, Zejnullahu K, Ercan D, Christensen JG, Wong KK, Gray NS, Jänne PA. Resistance to irreversible EGF receptor tyrosine kinase inhibitors through a multistep mechanism involving the IGF1R pathway. *Cancer Res.* 2012; 73: 834-43.
12. Yu HA, Arcila ME, Rekhman N, Sima CS, Zakowski MF, Pao W, Kris MG, Miller VA, Ladanyi M, Riely GJ. Analysis of tumor specimens at the time of acquired resistance to EGFR-TKI therapy in 155 patients with EGFR-mutant lung cancer. *Clin Cancer Res.* 2013; 19: 2240-47.
13. Zhang Z, Lee JC, Lin L, Olivas V, Au V, LaFramboise T, Abdel-Rahman M, Wang X, Levine AD, Rho JK, Choi YJ, Choi CM, Kim SW, et al. Activation of the AXL kinase causes resistance to EGFR-targeted therapy in lung cancer. *Nat Genet.* 2012; 44: 852-60.
14. Takezawa K, Pirazzoli V, Arcila ME, Nebhan CA, Song X, de Stanchina E, Ohashi K, Janjigian YY, Spitzler PJ, Melnick MA, Riely GJ, Kris MG, Miller VA, et al. HER2 amplification: a potential mechanism of acquired resistance to EGFR inhibition in EGFR-mutant lung cancers that lack the second-site EGFR T790M mutation. *Cancer Discov.* 2012; 2: 922-33.
15. Kobayashi S, Boggon TJ, Dayaram T, Jänne PA, Kocher O, Meyerson M, Johnson BE, Eck MJ, Tenen DG, Halmos B. EGFR mutation and resistance of non-small-cell lung cancer to gefitinib. *N Engl J Med.* 2005; 352: 786-92.
16. Miller VA, Hirsh V, Cadranel J, Chen YM, Park K, Kim SW, Zhou C, Su WC, Wang M, Sun Y, Heo DS, Crino L, Tan EH, et al. Afatinib versus placebo for patients with advanced, metastatic non-small cell lung cancer after failure of erlotinib, gefitinib, or both, and one or two lines of chemotherapy (LUX-Lung1): a phase 2b/3 randomized trial. *Lancet Oncol.* 2012; 13: 528-38.
17. Hirsh V, Cadranel J, Cong XJ, Fairclough D, Finnen HW, Lorence RM, Miller VA, Palmer M, Yang JC. Symptom and quality of life benefit of afatinib in advanced non-small-cell lung cancer patients previously treated with erlotinib or gefitinib: results of a randomized phase IIb/III trial (LUX-Lung 1). *J Thorac Oncol.* 2013; 8: 229-37.
18. Katakami N, Atagi S, Goto K, Hida T, Horai T, Inoue A, Ichinose Y, Kobayashi K, Takeda K, Kiura K, Nishio K, Seki Y, Ebisawa R, et al. LUX-Lung 4: phase II trial afatinib in patients with advanced non-small cell lung cancer who progressed during prior treatment with erlotinib, gefitinib, or both. *J Clin Oncol.* 2013; 31: 3335-41.
19. Janjigian YY, Smit EF, Groen HJ, Horn L, Gettinger S, Camidge DR, Riely GJ, Wang B, Fu Y, Chand VK, Miller VA, Pao W. Dual inhibition of EGFR with afatinib and cetuximab in kinase inhibitor-resistant EGFR-mutant lung cancer with and without T790M mutations. *Cancer Discov.* 2014; 4: 1036-45.
20. Li D, Ambrogio L, Shimamura T, Kubo S, Takahashi M, Chirieac LR, Padera RF, Shapiro GI, Baum A, Himmelsbach F, Rettig WJ, Meyerson M, Solca F, et al. BIBW2992, an irreversible EGFR/HER2 inhibitor highly effective in preclinical lung cancer models. *Oncogene.* 2008; 27: 4702-11.
21. Cross DA, Ashton SE, Ghiorghiu S, Eberlein C, Nebhan CA, Spitzler PJ, Orme JP, Finlay MR, Ward RA, Mellor MJ, Hughes G, Rahi A, Jacobs VN, et al. AZD9291, an irreversible EGFR TKI, overcomes T790M-mediated resistance to EGFR inhibitors in lung cancer. *Cancer Discov.* 2014; 4: 1046-61.
22. Jänne PA, Yang JC, Kim DW, Planchard D, Ohe Y, Ramalingam SS, Ahn MJ, Kim SW, Su WC, Horn L, Haggstrom D, Felip E, Kim JH, et al. AZD9291 in EGFR inhibitor-resistant non-small-cell lung cancer. *N Engl J Med.* 2015; 372: 1689-99.
23. Steuer CE, Khuri FR, Ramalingam SS. The next generation of epidermal growth factor receptor tyrosine kinase inhibitors in the treatment of lung cancer. *Cancer.* 2015; 121: E1-6.
24. Ercan D, Choi HG, Yun CH, Capelletti M, Xie T, Eck MJ, Gray NS, Jänne PA. EGFR mutations and resistance to irreversible pyrimidine based EGFR inhibitors. *Clin Cancer Res.* 2015; 21: 3913-23.
25. Niederst MJ, Hu H, Mulvey HE, Lockerman EL, Garcia AR, Piotrowska Z, Sequist LV, Engelman JA. The allelic context of the C797S mutation acquired upon treatment

- with third generation EGFR inhibitors impacts sensitivity to subsequent treatment strategies. *Clin Cancer Res.* 2015; 21: 3924-33.
26. Thress KS, Paweletz CP, Felip E, Cho BC, Stetson D, Dougherty B, Lai Z, Markovets A, Vivancos A, Kuang Y, Ercan D, Matthews SE, Cantarini M, et al. Acquired EGFR C797S mutation mediates resistance to AZD9291 in non-small cell lung cancer harboring EGFR T790M. *Nat Med.* 2015; 21: 560-2.
  27. Eberlein CA, Stetson D, Markovets AA, Al-Kadhimi KJ, Lai Z, Fisher PR, Meador CB, Spitzler P, Ichihara E, Ross SJ, Ahdesmaki MJ, Ahmed A, Ratcliffe LE, et al. Acquired resistance to the mutant-selective EGFR inhibitor AZD9291 is associated with increased dependence on RAS signaling in preclinical models. *Cancer Res.* 2015; 75: 2489-500.
  28. Piotrowska Z, Niederst MJ, Karlovich CA, Wakelee HA, Neal JW, Mino-Kenudson M, Fulton L, Hata AN, Lockerman EL, Kalsy A, Digumarthy S, Muzikansky A, Raponi M, et al. Heterogeneity underlies the emergence of EGFR T790 wild-type clones following treatment of T790M-Positive cancers with a third-generation EGFR inhibitor. *Cancer Discov.* 2015; 5: 713-22.
  29. Azuma K, Kawahara A, Sonoda K, Nakashima K, Tashiro K, Watari K, Izumi H, Kage M, Kuwano M, Ono M, Hoshino T. FGFR1 activation is an escape mechanism in human lung cancer cells resistant to afatinib, a pan-EGFR family kinase inhibitor. *Oncotarget.* 2014; 5: 5908-19. <https://doi.org/10.18632/oncotarget.1866>.
  30. Tabara K, Kanda R, Sonoda K, Kubo T, Murakami Y, Kawahara A, Azuma K, Abe H, Kage M, Yoshinaga A, Tahira T, Hayashi K, Arai T, et al. Loss of activating EGFR mutant gene contributes to acquired resistance to EGFR tyrosine kinase inhibitors in lung cancer cells. *PLoS One.* 2012; 7: e41017.
  31. Amann J, Kalyankrishna S, Massion PP, Ohm JE, Girard L, Shigematsu H, Peyton M, Juroske D, Huang Y, Stuart Salmon J, Kim YH, Pollack JR, Yanagisawa K, et al. Aberrant epidermal growth factor receptor signaling and enhanced sensitivity to EGFR inhibitors in lung cancer. *Cancer Res.* 2005; 65: 226-35.
  32. Yoshida T, Okamoto I, Okamoto W, Hatashita E, Yamada Y, Kuwata K, Nishio K, Fukuoka M, Jänne PA, Nakagawa K. Effect of Src inhibitors on cell growth and epidermal growth factor receptor and MET signaling in gefitinib-resistant non-small cell lung cancer cells with acquired MET amplification. *Cancer Sci.* 2010; 101: 167-72.
  33. Kanda R, Kawahara A, Watari K, Murakami Y, Sonoda K, Maeda M, Fujita H, Kage M, Uramoto H, Costa C, Kuwano M, Ono M. Erlotinib resistance in lung cancer cells by Integrin $\beta$ 1/Src/Akt-driven bypass signaling. *Cancer Res.* 2013; 73: 6243-53.
  34. Montero JC, Seoane S, Ocaña A, Pandiella A. Inhibition of SRC family kinases and receptor tyrosine kinases by dasatinib: possible combinations in solid tumors. *Clin Cancer Res.* 2011; 17: 5546-52.
  35. Li J, Rix U, Fang B, Bai Y, Edwards A, Colinge J, Bennett KL, Gao J, Song L, Eschrich S, Superti-Furga G, Koomen J, Haura EB. A chemical and phosphoproteomic characterization of dasatinib action in lung cancer. *Nat Chem Biol.* 2010; 6: 291-9.
  36. Deininger K, Eder M, Kramer ER, Zieglgänsberger W, Dödt HU, Dornmair K, Colicelli J, Klein R. The Rab5 guanylate exchange factor Rin1 regulates endocytosis of the EphA4 receptor in mature excitatory neurons. *Proc Natl Acad Sci U S A.* 2008; 105: 12539-44.
  37. Boyd AW, Bartlett PF, Lackmann M. Therapeutic targeting of EPH receptors and their ligands. *Nat Rev Drug Discov.* 2014; 13: 39-62.
  38. Koch H, Busto ME, Kramer K, Médard G, Kuster B. Chemical proteomics uncovers EPHA2 as a mechanism of acquired resistance to small molecule EGFR kinase inhibition. *J Proteome Res.* 2015; 14: 2617-25.
  39. Sulzmaier FJ, Jean C, Schlaepfer DD. FAK in cancer: mechanistic findings and clinical applications. *Nat Rev Cancer.* 2014; 14: 598-610.
  40. Wilson C, Nicholes K, Bustos D, Lin E, Song Q, Stephan JP, Kirkpatrick DS, Settleman J. Overcoming EMT-associated resistance to anti-cancer drugs via Src/FAK pathway inhibition. *Oncotarget.* 2014; 5: 7328-41. <https://doi.org/10.18632/oncotarget.2397>.
  41. Taliaferro-Smith L, Oberlick E, Liu T, McGlothen T, Alcaide T, Tobin R, Donnelly S, Commander R, Kline E, Nagaraju GP, Havel L, Marcus A, Nahta R, et al. FAK activation is required for IGF1R-mediated regulation of EMT, migration, and invasion in mesenchymal triple negative breast cancer cells. *Oncotarget.* 2015; 6: 4757-72. <https://doi.org/10.18632/oncotarget.3023>.
  42. Shapiro IM, Kolev VN, Vidal CM, Kadariya Y, Ring JE, Wright Q, Weaver DT, Menges C, Padval M, McClatchey AI, Xu Q, Testa JR, Pachter JA. Merlin deficiency predicts FAK inhibitor sensitivity: a synthetic lethal relationship. *Sci Transl Med.* 2014; 6: 237ra68.
  43. Serrels A, Lund T, Serrels B, Byron A, McPherson RC, von Kriegsheim A, Gómez-Cuadrado L, Canel M, Muir M, Ring JE, Maniati E, Sims AH, Pachter JA, et al. Nuclear FAK controls chemokine transcription, Tregs, and evasion of anti-tumor immunity. *Cell.* 2015; 163: 160-73.
  44. Wu SG, Liu YN, Tsai MF, Chang YL, Yu CJ, Yang PC, Yang JC, Wen YF, Shih JY. The mechanism of acquired resistance to irreversible EGFR tyrosine kinase inhibitor-afatinib in lung adenocarcinoma patients. *Oncotarget.* 2016; 7: 12404-13. <https://doi.org/10.18632/oncotarget.7189>.
  45. Booth L, Roberts JL, Tavallai M, Webb T, Leon D, Chen J, McGuire WP, Poklepovic A, Dent P. The afatinib resistance of *in vivo* generated H1975 lung cancer cell clones is mediated by SRC/ERBB3/c-KIT/c-MET compensatory survival signaling. *Oncotarget.* 2016; 7: 19620-30. <https://doi.org/10.18632/oncotarget.7746>.

46. Wilson LK, Luttrell DK, Parsons JT, Parsons SJ. pp60c-src tyrosine kinase, myristylation, and modulatory domains are required for enhanced mitogenic responsiveness to epidermal growth factor seen in cells overexpressing c-src. *Mol Cell Biol.* 1989; 9: 1536-44.
47. Sharifnia T, Rusu V, Piccioni F, Bagul M, Imielinski M, Cherniack AD, Pedamallu CS, Wong B, Wilson FH, Garraway LA, Altshuler D, Golub TR, Root DE, et al. Genetic modifiers of EGFR dependence in non-small cell lung cancer. *Proc Natl Acad Sci U S A.* 2014; 111: 18661-6.
48. Yoshida T, Zhang G, Smith MA, Lopez AS, Bai Y, Li J, Fang B, Koomen J, Rawal B, Fisher KJ, Chen YA, Kitano M, Morita Y, et al. Tyrosine phosphoproteomics identifies both codrivers and cotargeting strategies for T790M-related EGFR-TKI resistance in non-small cell lung cancer. *Clin Cancer Res.* 2014; 20: 4059-74.
49. Ono M, Hirata A, Kometani T, Miyagawa M, Ueda S, Kinoshita H, Fujii T, Kuwano M. Sensitivity to gefitinib (Iressa, ZD1839) in non-small-cell lung cancer cell lines correlates with dependence on the epidermal growth factor (EGF) receptor/ extracellular signal-regulated kinase 1/2 and EGF receptor/Akt pathway for proliferation. *Mol Cancer Ther.* 2004; 3: 465-72.
